# Supplementary material for: Sequence context induced antimicrobial activity: insight into lipopolysaccharide permeabilization
Source: Royal Society of Chemistry journal article supplement (doi:10.1039/c4mb00111g), 2014-03-25

## Supplementary material

### **Sequence Context Induced Antimicrobial Activity: Insight to Lipopolysaccharide Permeabilization**

Anirban Ghosh,<sup>1,Ψ</sup> Aritreyee Datta,<sup>1,Ψ</sup> Jagannath Jana,<sup>1,Ψ</sup> Rajiv K. Kar,<sup>1</sup> Chiradip Chatterjee,<sup>2</sup> Subhrangsu Chatterjee,<sup>1</sup> and Anirban Bhunia<sup>1,\*</sup>

<sup>1</sup>Biomolecular NMR and Drug Design Laboratory, Department of Biophysics, Bose Institute, P-1/12 CIT Scheme VII (M), Kolkata 700054, India.

<sup>2</sup>School of Applied Sciences, Republic Polytechnic, 9 Woodlands Avenue 9, Singapore 738964.

**Table S1. Antimicrobial activity (MIC) of WR17 and its analogues.**

| Peptide name | MIC ( $\mu\text{M}$ ) |                      |                    |
|--------------|-----------------------|----------------------|--------------------|
|              | <i>P. aeruginosa</i>  | <i>X. campestris</i> | <i>B. subtilis</i> |
| WR17         | 9.5                   | 10                   | 20                 |
| WG12         | >100                  | 75                   | >100               |
| WK10         | >100                  | >100                 | >100               |
| KG11         | >100                  | >100                 | >100               |
| KR12         | >100                  | >100                 | >100               |
| KK9          | >100                  | >100                 | >100               |
| KR8          | >100                  | >100                 | >100               |

**Table S2. LPS neutralization and depth of insertion by the designed peptides.**

| Peptide name | Neutralization of LPS at 0.25 EU/ml | Neutralization of LPS at 0.5 EU/ml | Neutralization of LPS at 1 EU/ml | Distance of Trp from LPS head group ( $\text{\AA}$ ) |
|--------------|-------------------------------------|------------------------------------|----------------------------------|------------------------------------------------------|
| WR17         | 5                                   | 10                                 | 15                               | 7.4                                                  |
| WG12         | 25                                  | 50                                 | 50                               | 7.1                                                  |
| KG11         | >100                                | >100                               | >100                             |                                                      |
| WK10         | >100                                | >100                               | >100                             |                                                      |
| KR12         | >100                                | >100                               | >100                             |                                                      |
| KR8          | >100                                | >100                               | >100                             |                                                      |
| KK9          | >100                                | >100                               | >100                             |                                                      |

**Table S3:** Table containing atom-wise interaction details (post-docking analysis) between peptides and LPS moieties.

Key Interaction of Lactoferrampin fragments with LPS moiety from docking studies.

| Interactions                         | WR17           | LPS moiety                                             | Distance (Å)        |
|--------------------------------------|----------------|--------------------------------------------------------|---------------------|
| <b><u>Polar Interactions</u></b>     | <b>L3.O</b>    | <b>Acyl.O</b>                                          | <b>2.7</b>          |
|                                      | <b>K10.NH</b>  | <b>GlcN II-(1→O)-PO<sup>2-</sup>-O-PO<sup>3-</sup></b> | <b>2.1</b>          |
|                                      | <b>N14.Nδ</b>  | <b>Acyl.O</b>                                          | <b>2.1</b>          |
|                                      | <b>N14.Nδ</b>  | <b>GlcN I-(4→O)-PO<sup>3-</sup></b>                    | <b>1.8</b>          |
|                                      | <b>R17.NH1</b> | <b>GlcN I-(4→O)-PO<sup>3-</sup></b>                    | <b>1.7</b>          |
| <b><u>Non-Polar Interactions</u></b> | <b>L3.Cβ</b>   | <b>Acyl.C</b>                                          | <b>3.9</b>          |
|                                      | <b>L3.Cδ</b>   | <b>Acyl.C</b>                                          | <b>3.9</b>          |
|                                      | <b>L4.Cδ</b>   | <b>Acyl.C</b>                                          | <b>4.0</b>          |
|                                      | <b>A7.Cβ</b>   | <b>Acyl.C</b>                                          | <b>2.9</b>          |
|                                      | <b>F11.CZ</b>  | <b>GlcN.C</b>                                          | <b>3.6</b>          |
|                                      | <b>K13.Cδ</b>  | <b>KDO.C</b>                                           | <b>4.5</b>          |
|                                      | <b>WG12</b>    | <b>LPS moiety</b>                                      | <b>Distance (Å)</b> |
| <b><u>Polar Interactions</u></b>     | <b>K2.NZ</b>   | <b>KDO.O/O/OH</b>                                      | <b>2.8</b>          |
|                                      | <b>S5.OG</b>   | <b>Acyl.H</b>                                          | <b>2.9</b>          |
|                                      | <b>S5.CB</b>   | <b>Acyl.O</b>                                          | <b>2.0</b>          |
|                                      | <b>Q8.OE</b>   | <b>Acyl.H</b>                                          | <b>3.2</b>          |
|                                      | <b>Q8.OE</b>   | <b>Acyl.OH</b>                                         | <b>1.9</b>          |
| <b><u>Non-Polar Interactions</u></b> | <b>W1.CE</b>   | <b>Acyl.C</b>                                          | <b>3.2</b>          |
|                                      | <b>L4.Cδ</b>   | <b>Acyl.C</b>                                          | <b>3.8</b>          |
|                                      | <b>WK10</b>    | <b>LPS moiety</b>                                      | <b>Distance (Å)</b> |
| <b><u>Polar Interactions</u></b>     | <b>Q8.HE</b>   | <b>Acyl.O</b>                                          | <b>1.9</b>          |

|                                      |                     |                                                        |                     |
|--------------------------------------|---------------------|--------------------------------------------------------|---------------------|
|                                      | <b>E9.OE</b>        | <b>GlcN II-(1→O).N</b>                                 | <b>2.3</b>          |
| <b><u>Non-Polar Interactions</u></b> | <b>W1.Cδ/ W1.Cα</b> | <b>Acyl.C/ Acyl.C</b>                                  | <b>3.3/3.7</b>      |
|                                      | <b>K2.Cβ</b>        | <b>Acyl.C</b>                                          | <b>3.2</b>          |
|                                      | <b>S5.Cβ</b>        | <b>Acyl.C</b>                                          | <b>4.0</b>          |
| <hr/>                                |                     |                                                        |                     |
|                                      | <b>KR8</b>          | <b>LPS moiety</b>                                      | <b>Distance (Å)</b> |
| <b><u>Polar Interactions</u></b>     | <b>K4.NZ</b>        | <b>Acyl.O/ Acyl.O</b>                                  | <b>2.3/2.7</b>      |
|                                      | <b>N5.Oδ</b>        | <b>Acyl.OH/ Acyl.OH</b>                                | <b>1.9/2.0</b>      |
|                                      | <b>K6.NZ</b>        | <b>Acyl.O</b>                                          | <b>2.0</b>          |
|                                      | <b>K6.NZ</b>        | <b>GlcN I-(4→O)-PO<sup>3-</sup></b>                    | <b>2.0</b>          |
|                                      | <b>R8.NH1</b>       | <b>GlcN II-(1→O).O</b>                                 | <b>1.9</b>          |
|                                      | <b>R8.NH2</b>       | <b>GlcN II-(1→O)-PO<sup>2-</sup>-O-PO<sup>3-</sup></b> | <b>2.4</b>          |
|                                      | <b>R8.NH2</b>       | <b>KDO.O/KDO.O</b>                                     | <b>2.5/1.9</b>      |
| <b><u>Non-Polar Interactions</u></b> | <b>F2.CE</b>        | <b>Acyl.O</b>                                          | <b>3.4</b>          |

Table S4. A Summary of Structural Statistics for the 20 Final NMR Structures of peptides in LPS micelle.

| <b>Distance restraints</b>                                                     | WR17            | WG12            | WK10            | KR8             |
|--------------------------------------------------------------------------------|-----------------|-----------------|-----------------|-----------------|
| Intra-residue ( $i-j = 0$ )                                                    | 36              | 20              | 29              | 15              |
| Sequential ( $ i-j  = 1$ )                                                     | 52              | 41              | 32              | 17              |
| Medium-range ( $2 \leq  i-j  \leq 4$ )                                         | 57              | 53              | 40              | 1               |
| Long-range ( $ i-j  \geq 5$ )                                                  | 0               | 0               | 0               | 0               |
| <b>Total</b>                                                                   | 145             | 114             | 101             | 33              |
| <b>Angular restraints</b>                                                      |                 |                 |                 |                 |
| $\Phi$                                                                         | 16              | 11              | 9               | 7               |
| $\Psi$                                                                         | 16              | 11              | 9               | 7               |
| <b>Distance restraints from violations (<math>\geq 0.3 \text{ \AA}</math>)</b> | 0               | 0               | 0               | 0               |
| <b>Deviation from mean structure (<math>\text{\AA}</math>)</b>                 |                 |                 |                 |                 |
| Average back bone to mean structure                                            | 1.43 $\pm$ 0.53 | 0.10 $\pm$ 0.05 | 0.34 $\pm$ 0.13 | 1.06 $\pm$ 0.25 |
| N-ter region " <i>Trp1-Gly12</i> " of WR17                                     | 0.05 $\pm$ 0.01 |                 |                 |                 |
| Average heavy atom to mean structure                                           | 2.23 $\pm$ 0.65 | 0.55 $\pm$ 0.08 | 1.21 $\pm$ 0.29 | 2.13 $\pm$ 0.42 |
| <b>Ramachandran plot for mean structure</b>                                    |                 |                 |                 |                 |
| % Residues in the most favourable and additionally allowed regions             | 100             | 100             | 100             | 100             |
| % Residues in the generously allowed Region                                    | 0               | 0               | 0               | 0               |
| % Residues in the disallowed region                                            | 0               | 0               | 0               | 0               |

**Fig. S1:** Selected amide region of two dimensional  $^1\text{H}$ - $^1\text{H}$  NOESY spectrum of WR17, WG12, WK10, KR12 and KR8 in water at pH 4.5. The lack of NOEs indicates that the peptides did not adopt any folded conformation in water. NOESY experiments were carried out at 500 MHz and 298 K, with a mixing time of 150 ms.

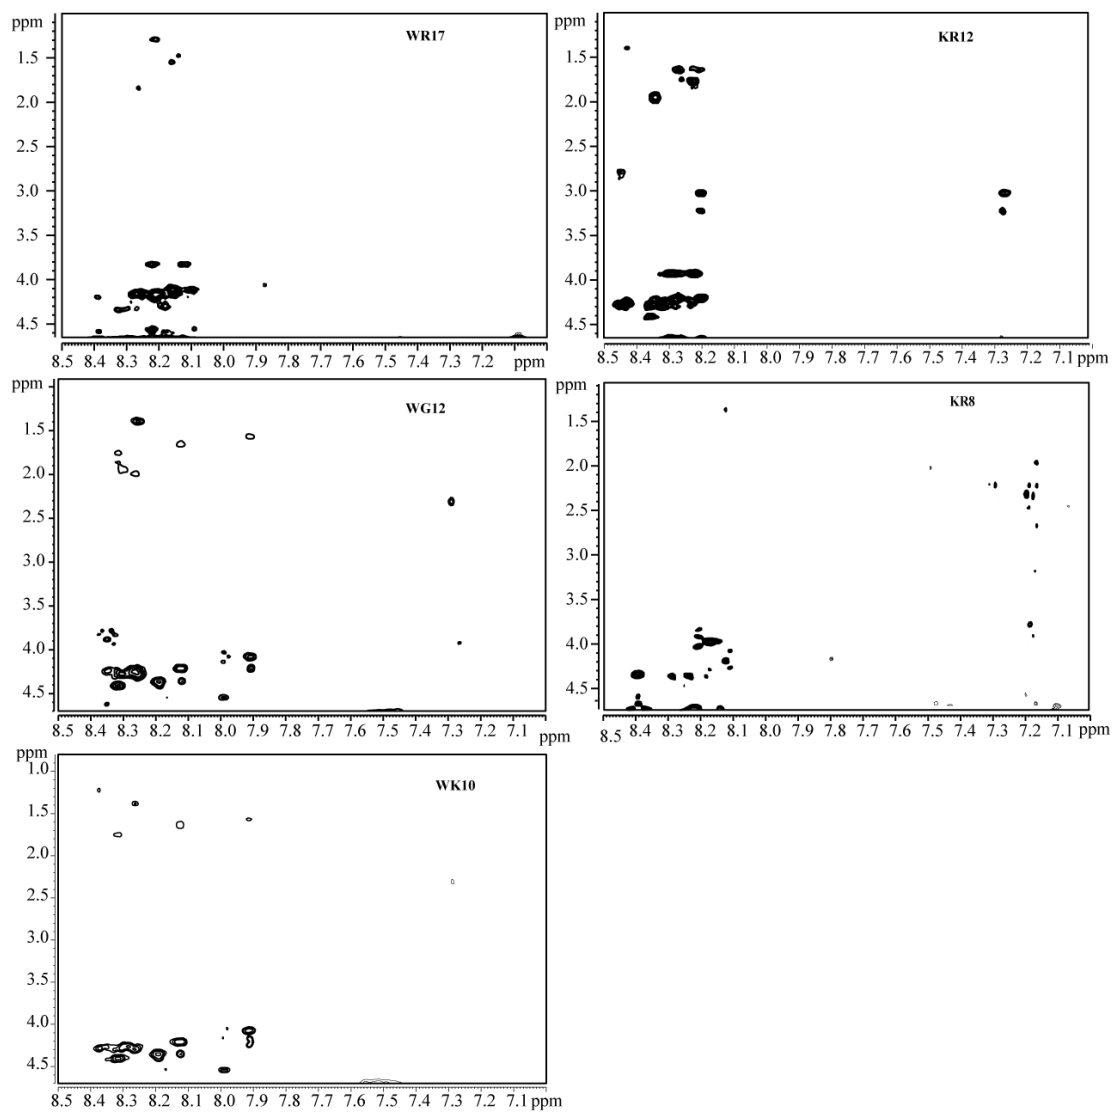

**Fig. S2:** Selected amide region of two dimensional  $^1\text{H}$ - $^1\text{H}$  *tr*NOESY spectrum of KG11 and KK9 in presence of LPS. The lack of NOEs indicates that the peptides did not adopt any folded conformation in the presence of LPS.

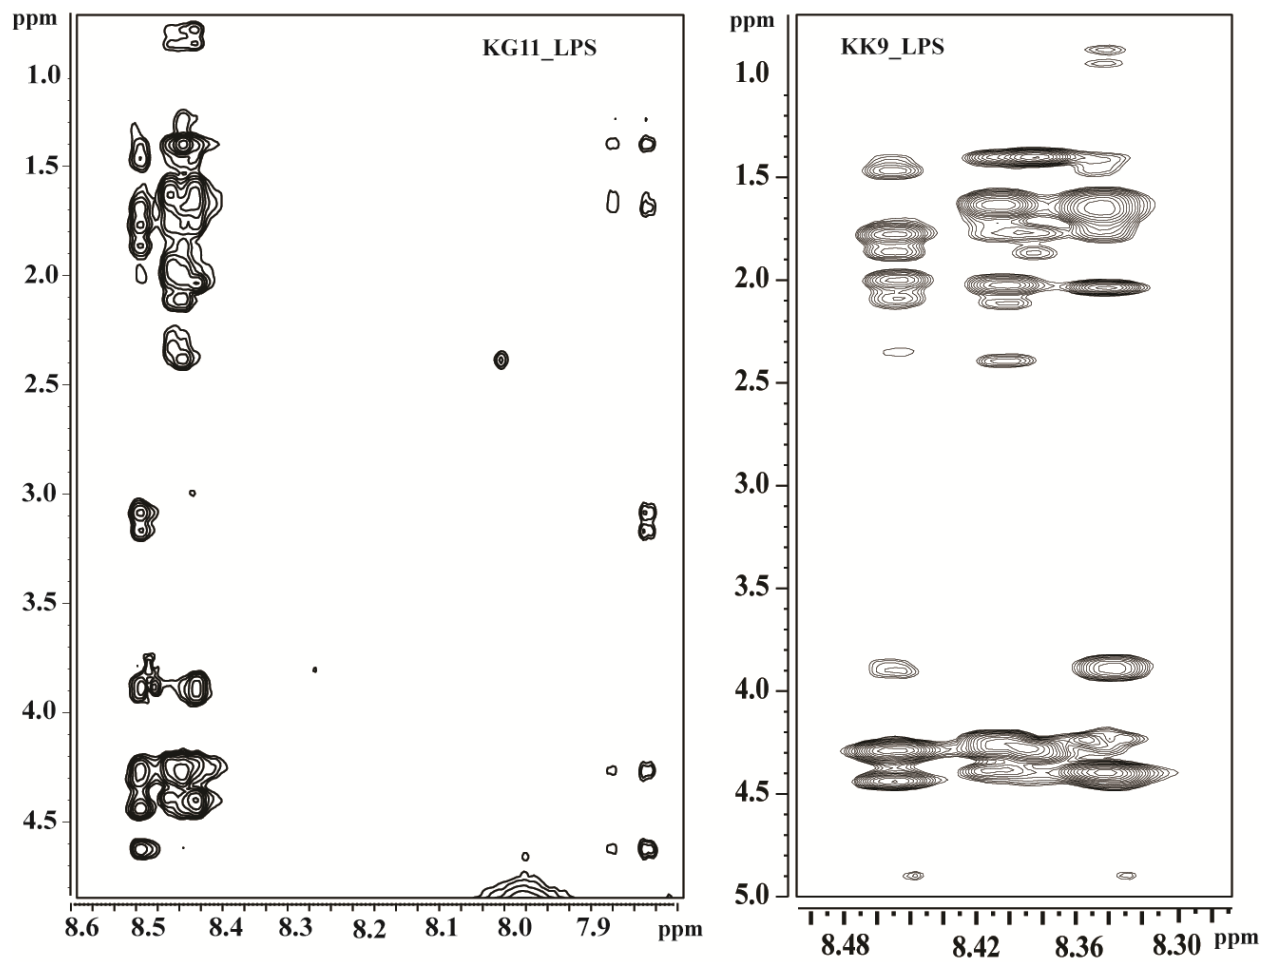

**Fig. S3:** SASA plots for peptides with LPS moiety as a function of time from MD simulation.

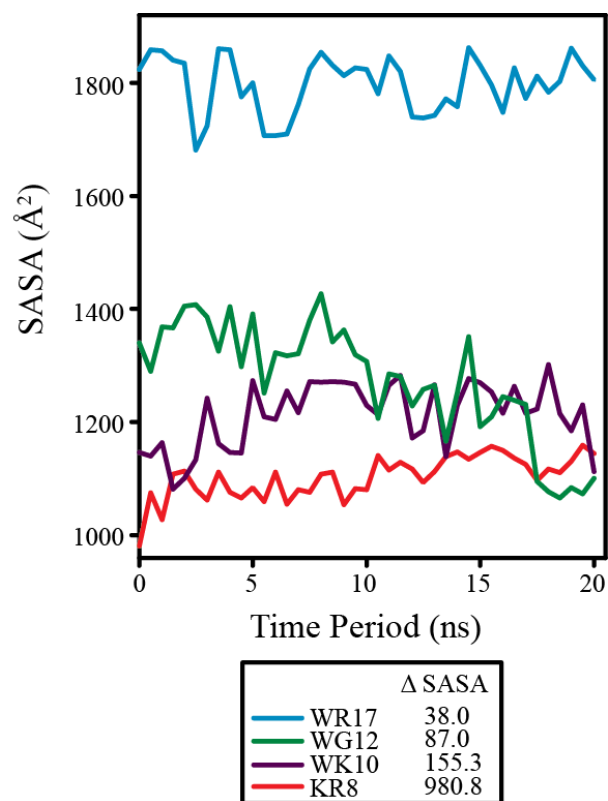

**Fig. S4:** Distance measurement plot between atoms involved in forming polar contacts. Lys10 and Arg17 (of WR17) are forming strong hydrogen bonds with a phosphate group of LPS, which are consistent throughout the simulation time course.

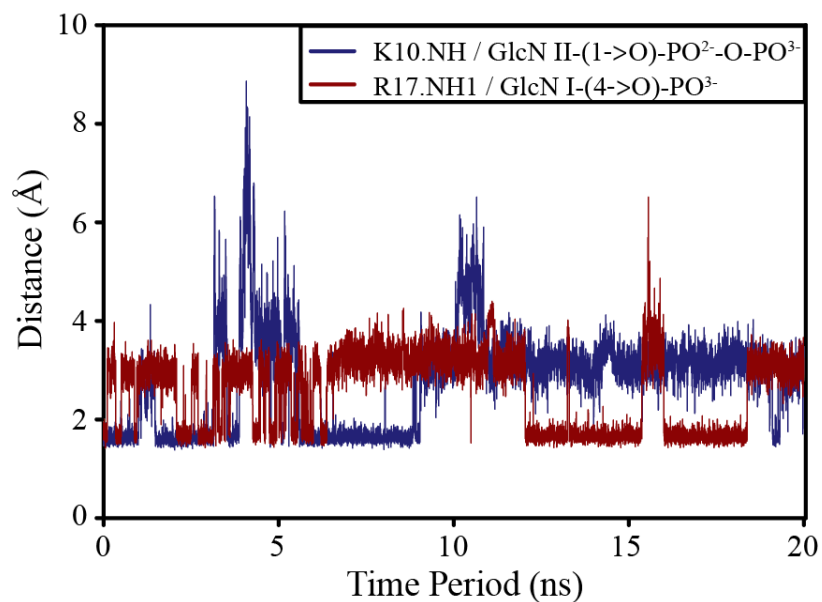

Supplement: c4mb00111g1.pdf [file c4mb00111g1.pdf]
